# Supplementary material
Source: publisher site journal article supplement (https://www.dovepress.com/article/373675)
Supplement: Supplementary file 1 [file get_supplementary_file.php]

## Supplementary material

**Table S1.** Characteristics of the cases with persistent FTMH after the first surgery.

| <b>Case</b> | <b>Total number of operations</b> | <b>Hole Size Before 1st Surgery (<math>\mu\text{m}</math>)</b> | <b>Axial length, mm</b> | <b>Surgery Time Interval before 2nd surgery (weeks)</b> | <b>Hole Size Before 2nd Surgery (<math>\mu\text{m}</math>)</b> | <b>Second Surgical Intervention</b>                                                        | <b>Surgery Time Interval before 3rd surgery (weeks)</b> | <b>Hole Size Before 3rd Surgery (mm)</b> | <b>Third Surgical Intervention</b> | <b>Final Anatomical Result</b> | <b>Final Visual Result</b> |
|-------------|-----------------------------------|----------------------------------------------------------------|-------------------------|---------------------------------------------------------|----------------------------------------------------------------|--------------------------------------------------------------------------------------------|---------------------------------------------------------|------------------------------------------|------------------------------------|--------------------------------|----------------------------|
| Patient 1   | 3                                 | 614                                                            | 28.4                    | 1                                                       | 568                                                            | Hydraulic macular displacement + SF <sub>6</sub>                                           | 2                                                       | 618                                      | Free ILM flap + silicon            | Closed                         | 20/40                      |
| Patient 2   | 2                                 | 154                                                            | 30.2                    | 1                                                       | 144                                                            | Hydraulic macular displacement + Inverted pedicle ILM flap transposition + SF <sub>6</sub> | -                                                       | -                                        | -                                  | Closed                         | 20/50                      |
| Patient 3   | 2                                 | 542                                                            | 27.6                    | 1                                                       | 357                                                            | Hydraulic macular displacement + Inverted pedicle ILM flap transposition + SF <sub>6</sub> | -                                                       | -                                        | -                                  | Closed                         | 20/40                      |
| Patient 4   | 2                                 | 694                                                            | 23.0                    | 1                                                       | 448                                                            | Hydraulic macular displacement + Inverted pedicle ILM flap transposition + SF <sub>6</sub> | -                                                       | -                                        | -                                  | Closed                         | 20/40                      |
